# Supplementary material
Source: Springer Nature journal article supplement (https://www.springermedizin.de/resource/supplementary/12955_2008_471_MOESM2_ESM.pdf/9560526)
Supplement: MOESM2 [file 9560526]

(a) Do you have this symptom when you have flares of ulcerative colitis?

Rate this on the 1-10 scale as illustrated below with a single vertical line:

1 10  
Never occurs Sometimes occurs Always occurs

(b) Does this symptom improve after you start effective therapy for ulcerative colitis?

Rate this on the 1-10 scale as illustrated below with a single vertical line:

1 10  
Never improves Sometimes improves Always improves

(c) Is this symptom present when your ulcerative colitis is well controlled (in remission)?

Rate this on the 1-10 scale as illustrated below with a single vertical line:

1 10  
Never present Sometimes present Always present
